# Supplementary material for: Role of Chaperone Mediated Autophagy (CMA) in the Degradation of Misfolded N-CoR Protein in Non-Small Cell Lung Cancer (NSCLC) Cells
Source: PubMed Central journal article supplement (PMC3179509; doi:10.1371/journal.pone.0025268), 2011-09-23
Supplement: pone.0025268.s001.pdf [file pone.0025268.s001.pdf]

## Lung cancer cell lines used in this study

| <u>Nos.</u> | <u>Name of cell line</u> | <u>ATCC No.</u> | <u>Disease subtype</u>                             | <u>N-CoR protein level</u> |
|-------------|--------------------------|-----------------|----------------------------------------------------|----------------------------|
| 1           | H1299                    | CRL-5803        | NSCLC (Large cell carcinoma)                       | +                          |
| 2           | H358                     | CRL-5807        | NSCLC (bronchioloalveolar)                         | -                          |
| 3           | H596                     | HTB-178         | adenosquamous carcinoma (NSCLC)                    | -                          |
| 4           | H2170                    | CRL-5928        | squamous cell carcinoma (NSCLC)                    | -                          |
| 5           | DMS-79                   | CRL-2049        | SCLC                                               | +++                        |
| 6           | H23                      | CRL-5800        | NSCLC                                              | -                          |
| 7           | HLF-a                    | CCL-199         | epidermoid                                         | -                          |
| 8           | H647                     | CRL-5834        | adenosquamous carcinoma (NSCLC)                    | -                          |
| 9           | H1650                    | CRL-5883        | adenocarcinoma (NSCLC)                             | -                          |
| 10          | H1703                    | CRL-5889        | adenocarcinoma; (NSCLC)                            | -                          |
| 11          | SW1573                   | CRL-2170        | alveolar cell carcinoma                            | -                          |
| 12          | H1869                    | CRL-5900        | NSCLC<br>adenocarcinoma; bronchoalveolar carcinoma | +                          |
| 13          | H1666                    | CRL-5885        | (NSCLC)                                            | -                          |
| 14          | H650                     | CRL-5835        | bronchoalverolar carcinoma; (NSCLC)                | +                          |
| 15          | H2286                    | CRL-5938        | adenocarcinoma; squamous cell carcimoa (NSCLC)     | -                          |

**Table 1**

**Primary human NSCLC derived tissue used in this study**

| <b><u>No</u></b> | <b><u>NT number</u></b> | <b><u>Disease subtype</u></b>                                    | <b><u>% of tumor cells in sample</u></b> |
|------------------|-------------------------|------------------------------------------------------------------|------------------------------------------|
| 1                | T01: NT00/0093          | Adenocarcinoma, mixed pattern                                    | -                                        |
| 2                | T02: NT04/0223          | Adenocarcinoma, mixed-subtype, moderate to poorly differentiated | -                                        |
| 3                | T03: NT08/0310          | Adenocarcinoma, well differentiated with mix pattern             | -                                        |
| 4                | T05: NT00/0065          | Adenocarcinoma-Moderately differentiated                         | 75                                       |
| 5                | T03: NT07/0210          | Adenocarcinoma-Moderately differentiated                         | 70                                       |
| 6                | T05: NT08/0482          | Adenocarcinoma-poorly differentiated                             | 70                                       |
| 7                | T01: NT10/0004          | Adenocarcinoma-Moderately differentiated                         | 75                                       |
| 8                | T01: NT10/0054          | Adenocarcinoma-Moderately differentiated                         | 65                                       |
| 9                | T01: NT10/0144          | Adenocarcinoma-Mixed subtype                                     | 75                                       |
| 10               | T01: NT10/0207          | Adenocarcinoma-Mix subtype mod. differentiated                   | 70                                       |

**Table 2**

## Supporting Legends

**Table 1.** The name, number and histological subtypes of cells as mentioned in the vendor's catalogues are presented. The relative level of full length N-CoR protein in various Lung cancer cells determined by western blotting was presented in column 5 and was graded by "+" or "-" symbols depending on intensity level of N-CoR protein band. Level of full length N-CoR protein in most NSCLC derived cells was very low and undetectable by western blotting with N-CoR antibody. Level of full length N-CoR protein was highest in SCLC derived cells DMS-79 (+++) and very low (-) in most NSCLC derived cells.

**Table 2.** The identification number, histological subtype and relative homogeneity of primary NSCLC samples obtained from the tissue repository of National University Hospital and used in this study are presented.
